1 **Title**

2 Human stem cell derived sensory neurons are positioned to support varicella zoster virus

3 latency

4

5 **Running Title**

6 VZV infection of sensory neurons

7

8 **Byline**

9 Tomohiko Sadaoka<sup>1\*#</sup>, Labchan Rajbhandari<sup>2\*</sup>, Priya Shukla<sup>2</sup>, Balaji Jagdish<sup>2</sup>, Hojae Lee<sup>3</sup>,

10 Gabsang Lee<sup>3, 4</sup>, Arun Venkatesan<sup>2#</sup>

11

12 **Affiliation**

13 <sup>1</sup>Division of Clinical Virology, Center for Infectious Diseases, Kobe University Graduate

14 School of Medicine, Kobe, Japan.

15 <sup>2</sup>Division of Neuroimmunology and Neuroinfectious Diseases, Department of Neurology,

16 Johns Hopkins University School of Medicine, Baltimore, Maryland, USA

17 <sup>3</sup>Institute for Cell Engineering, Department of Neurology, Johns Hopkins University

18 School of Medicine

19 <sup>4</sup>The Solomon H Snyder Department of Neuroscience, Johns Hopkins University School

20 of Medicine, Baltimore, Maryland, USA

21

22 \* Tomohiko Sadaoka and Labchan Rajbhandari contributed equally to this work. Author  
23 order was determined on the basis of overall contribution to experiments and writing of  
24 the manuscript.

25

26 **#Corresponding authors**

27 Tomohiko Sadaoka, tomsada@crystal.kobe-u.ac.jp

28 Arun Venkatesan, avenkat2@jhmi.edu

29

30 Abstract word count: 184

31 Importance word count: 142

32 Manuscript word count: 2,672

33 Figures: 5

34 Table: 1

35

36 Key words: VZV, zoster, latency, reactivation, stem cell, sensory neuron

37

38 **ABSTRACT**

39

40 The neuropathogenesis of varicella-zoster virus (VZV) has been challenging to study due  
41 to the strict human tropism of the virus and the resultant difficulties in establishing  
42 tractable experimental models. *In vivo*, sensory neurons of the dorsal root ganglia and  
43 trigeminal ganglia serve as cellular niches that support viral latency, and VZV can  
44 subsequently reactivate from these cells to cause disease. Whether sensory neurons  
45 possess intrinsic properties that position them to serve as a reservoir of viral latency  
46 remains unknown. Here, we utilize a robust human sensory neuron system to investigate  
47 lytic infection and viral latency. We find that sensory neurons exhibit resistance to lytic  
48 infection by VZV. On the other hand, latent infection in sensory neurons is associated  
49 with an episomal-like configuration of viral DNA and expression of the VZV latency-  
50 associated transcript (VLT), thus closely mirroring the *in vivo* state. Moreover, despite the  
51 relative restriction in lytic infection, we demonstrate that viral reactivation is possible from  
52 latently infected sensory neurons. Taken together, our data suggest that human sensory  
53 neurons possess intrinsic properties that serve to facilitate their role as a latent reservoir  
54 of VZV.

55

56 **IMPORTANCE**

57 Varicella-zoster virus (VZV) has infected over 90% of people worldwide. Following  
58 primary infection, the virus can remain dormant in the nervous system and may reactivate  
59 later in life, with potentially severe consequences. Here, we develop a model of VZV  
60 infection in human sensory neurons in order to determine whether these cells are  
61 intrinsically positioned to support latency and reactivation. We find that human sensory  
62 neurons are relatively resistant to lytic infection, but can support latency and reactivation.  
63 Moreover, during *in vitro* latency human sensory neurons, but not other neurons, express  
64 the newly discovered VZV latency-associated transcript (VLT), thus closely mirroring the  
65 *in vivo* latent state. Taken together, these data indicate that human sensory neurons are  
66 uniquely positioned to support latency. We anticipate that this human sensory neuron  
67 model will serve to facilitate further understanding of the mechanisms of VZV latency and  
68 reactivation.

69

## 70 INTRODUCTION

71 Varicella-zoster virus (VZV) is a neurotropic human alphaherpesvirus that has infected  
72 over 90% of people worldwide. Following primary infection, the virus establishes lifelong  
73 latency in sensory neurons of the cranial nerve and dorsal root ganglia (DRG) with the  
74 potential for reactivation later in life (1, 2). Viral reactivation can have severe  
75 consequences, including herpes zoster (shingles), encephalitis, and myelitis (3, 4), and  
76 has recently been associated with giant cell arteritis (5). Worldwide, an increasingly aging  
77 population and the more widespread adoption of novel immunosuppressive therapies for  
78 autoimmune conditions place individuals at growing risk for viral reactivation (6), pointing  
79 to the need to better understand the neuropathogenesis of VZV.

80

81 The cell type specificity of VZV latency remains poorly understood, in part due to lack of  
82 tractable models to study viral neuropathogenesis. Primary dissociated neurons from  
83 adult human sensory ganglia have been isolated and infected, as have fetal DRG (7, 8).  
84 These models have been useful in demonstrating some aspects of VZV-neuronal  
85 interactions; for example, in SCID (severe combined immunodeficiency) mice  
86 xenografted with human fetal DRG, viral replication occurred in a subset of neurons but  
87 was blocked in cells that expressed the mechanoreceptor marker RT97 (9-11). More  
88 recently, *in vitro* neuronal models of VZV infection utilizing human neural stem cells (12)  
89 and human embryonic stem cells (ESC) (13) have been developed. We and others have  
90 used such models to study various aspects of VZV neuropathogenesis, including  
91 characterization of transcriptional changes in infected cells, demonstration of viral axonal

92 transport, exploration of the role of the cellular JNK pathway in viral infection, and  
93 establishment of models of viral latency and reactivation (13-18).

94

95 Despite these advances, a tractable model of human sensory neuronal infection by VZV  
96 has, to date, been elusive (19). As a result, it has remained unclear as to whether sensory  
97 neurons possess intrinsic features that contribute to their role in VZV neuropathogenesis  
98 in humans. Here, we utilize a robust human induced pluripotent stem cell (iPSC)-derived  
99 sensory neuron system to test the hypothesis that sensory neurons *in vitro* are uniquely  
100 poised to support VZV latency and reactivation.

101

## 102 **RESULTS**

### 103 **Characterization of a human sensory neuron system to study VZV infection**

104 To develop a robust sensory neuron platform for the study of VZV infection, we utilized  
105 human sensory neuron progenitor cells to generate mature human sensory neurons  
106 (HSNs). By two weeks of differentiation, over 90% of cells expressed the pan-neuronal  
107 marker neurofilament (**Fig 1A**). Expression of sensory neuronal markers peripherin and  
108 brain-specific homeobox/POU domain protein 3A (Brn3a) was noted in subsets of cells,  
109 and occasional pockets of Islet 1 positive cells were also noted. By four weeks of  
110 differentiation, Brn3a is clearly localized to the nucleus (arrows, top panel in **Figure 1B**)  
111 in Tuj1 (the neuronal cytoplasmic marker beta III tubulin) positive neurons, in keeping with  
112 its role as a nuclear homeodomain transcription factor. Peripherin, an intermediate  
113 filament protein, is localized to the cytoplasm and neuronal processes, with a similar  
114 expression pattern to Tuj1 as expected (middle and bottom panels in **Figure 1B**). Subsets

115 of voltage-gated ion channels, Na<sub>v</sub>1.7 and Na<sub>v</sub>1.8 positive cells, each of which colocalize  
116 with Tuj1 and peripherin, are observed (arrows, middle and bottom panels, respectively  
117 in **Figure 1B**). By six weeks of differentiation, >90% of cells are positive for peripherin  
118 and Brn3a, >80% are positive for Islet 1 and >50% are positive for Na<sub>v</sub>1.7 and Na<sub>v</sub>1.8,  
119 indicating a mature sensory neuron phenotype (top panel in **Fig 1C**). In contrast, our  
120 human ESC-derived neurons (16, 18) represent a mixed population (human mixed  
121 neurons; HMNs) that express CNS (central nervous system) markers such as GABA<sub>A</sub>  
122 receptor, Glycine receptor, and CTIP1 along with robust expression of the pan-neuronal  
123 markers Map2 and Tuj1 (16, 18). Expression of the sensory neuronal markers peripherin,  
124 Brn3a, Islet 1, and Na<sub>v</sub>1.8 was rarely (<1% of cells) observed in HMNs (lower panel in  
125 **Fig 1C**).

126

### 127 **Lytic infection of sensory neurons**

128 Following characterization of HSN, we first attempted to infect them with VZV via standard  
129 conditions (16, 18). HSNs and HMNs differentiated for six to seven weeks were exposed  
130 to cell-free rVZV<sub>LUCBAC</sub> (20), which contains a GFP cassette that is expressed upon  
131 infection. While GFP expression was noted in HMNs by day 3 and was robust by day 5,  
132 no such expression was observed in HSNs (**Fig 2A**). Since flow cytometry may enable  
133 more sensitive detection of GFP, we dissociated infected cells and assessed for GFP  
134 expression in a quantitative manner. While 5-12% of HMNs expressed GFP by day 5  
135 following infection as judged by flow cytometry, GFP expression was undetectable in two  
136 of three HSN cultures and in the third less than 1% of cells expressed GFP (**Fig 2B**). In

137 addition, while the VZV glycoprotein E (gE) was readily detectable by Western blot from  
138 lysates of infected HMNs, no such expression was observed in HSNs (**Fig 2C**).

139

#### 140 **Relative resistance to lytic infection in sensory neurons**

141 Since we occasionally observed limited numbers of HSNs expressing GFP by flow  
142 cytometry following infection with rVZV<sub>LUC</sub>BAC under standard conditions (**Fig 2B**), we  
143 next determined whether we could establish conditions in which lytic infection in HSNs  
144 was more robust. We found that doubling the amount of virus added to HMNs resulted in  
145 increased GFP expression, such that 19-26% of HMNs expressed GFP at five days post  
146 infection (**Fig 3A, top row; compare to Figure 2B, top row**). However, even when using  
147 ten times the amount of virus, GFP expression was undetectable in two of three HSN  
148 cultures and in the third only 0.14% of cells were found to express GFP (**Fig 3A**). We next  
149 sought to determine whether viral nucleic acid was present in HSNs, which might occur  
150 despite absence of robust GFP expression, the latter of which depends upon substantial  
151 viral replication. We examined transcription of immediate-early (IE) ORF61, early (E)  
152 ORF29, and late (L) ORF14 gene. We detected all kinetic classes of transcripts in HMNs  
153 differentiated for either four or six weeks and in one set each of the HSNs, though at lower  
154 levels (**Fig 3B**). Notably, however, in two of three HSN cultures differentiated for either  
155 four or six weeks, only very low levels of ORF61 were detectable while ORF29 and  
156 ORF14 were undetectable. We also examined viral DNA and found that HSNs harbored  
157 lower levels of VZV DNA as compared to HMNs, regardless of whether neurons were  
158 differentiated for four or six weeks prior to infection (**Fig 3C**).

159



160 We then examined whether the restriction in lytic infection in HSNs is so severe as to  
161 preclude the development of productive virus altogether. HSNs differentiated for six  
162 weeks were infected for one to two weeks - longer than the standard three to five days -  
163 and cells were analyzed for viral nucleic acid. We were able to detect IE, E, and L  
164 transcripts at one week following infection, and levels of each had increased by two weeks  
165 following infection (**Fig 4A**). Similarly, viral DNA was detected at 1 week post infection  
166 (w.p.i.), with increasing amounts observed at 2 w.p.i. (**Fig 4B**). In order to determine  
167 whether productive virus was formed from infected HSNs, cells were scraped, placed  
168 atop a monolayer of ARPE19 cells and cultured for seven days. Infectious focus formation  
169 was confirmed on ARPE-19 cells, and consistent with increasing amount of viral  
170 transcripts and viral DNA replication, infectious focus counts were increased from one  
171 week to two weeks (**Fig 4C**).

172

### 173 **Human sensory neurons are permissive to VZV latency and reactivation *in vitro***

174 We next examined the establishment of latency in HSNs. We took advantage of a  
175 microfluidic platform that we have previously developed that allows for axonal infection of  
176 neurons, a factor that appears critical for developing an *in vitro* latent state (16, 18) (**Fig**  
177 **5A**). In this platform, neuronal cell bodies are cultured in the somal compartment and  
178 allowed to extend axons into the fluidically restricted axonal compartment. Cell-free VZV  
179 is then added specifically to the axonal compartment, following which an *in vitro* latent  
180 state may be established in a small number of neurons (orange cells, middle panel of **Fig**  
181 **5A**). RT-qPCR using RNA isolated from the somal compartment revealed the presence  
182 of the VLT transcript in HSNs via two different primer sets, while VLT was undetectable

183 in HMNs (**Fig 5B**). A primer set targeting ORF63, whose transcript was also detected in  
184 human trigeminal ganglia (TG) harboring VZV DNA though at substantially lower levels  
185 than VLT (21), did not result in detectable expression in either HSNs or HMNs. We also  
186 examined the configuration of the VZV viral genome by using the ratio of terminal repeat  
187 joint to genomic linear region abundance, and found the ratios in both HSNs and HMNs  
188 to be close to one (**Fig 5C**), indicating a predominantly circular conformation of viral DNA  
189 as would be expected were the virus in an episomal configuration as occurs during latency  
190 either *in vivo* or *in vitro* (16, 22).

191

192 Finally, we sought to determine whether viral reactivation could occur following the  
193 establishment of an *in vitro* latent state of VZV infection in HSNs. HSNs infected with cell-  
194 free VZV from the axonal compartment were cultured for 14 days to establish latency,  
195 followed by depletion of neurotropic factors (NGF, GDNF, BDNF and NT-3) and treatment  
196 with anti-NGF Ab (50 mg/mL) for 14 days. Transfer onto ARPE-19 cells and culture for a  
197 subsequent seven days resulted in two of forty independent samples in which complete  
198 viral reactivation was detected via infectious focus forming assay on ARPE-19 cells  
199 (**Figure 5D**).

200

## 201 **DISCUSSION**

202 In humans, sensory neurons represent a unique cellular niche that supports VZV latency.  
203 Here, we have established a robust human sensory neuron model system *in vitro*, and  
204 demonstrated that these cells are relatively resistant to lytic infection by the virus. Latent  
205 infection of these sensory neurons appears to closely mimic that of human TG *in vivo*

206 (21). Furthermore, we were able to observe productive viral reactivation from the *in vitro*  
207 latent state. These data suggest that human sensory neurons possess intrinsic properties  
208 that facilitate VZV latency, and that these properties can be recapitulated *in vitro*.

209

210 It has long been recognized that viral latency of many neurotropic alphaherpesviruses is  
211 associated with the expression of a single or restricted set of LATs (latency-associated  
212 transcripts) that map antisense to the gene encoding the ICP0 (infected cell polypeptide  
213 0) of herpes simplex virus and its analogues (23-25). Recent work has demonstrated that  
214 latent infection in human TG by VZV, too, is accompanied by such a transcript, termed  
215 VZV latency-associated transcript, VLT (21, 26). Deep sequencing of virus nucleotide-  
216 enriched RNA from human TGs with short post-mortem interval consistently  
217 demonstrated that viral expression is highly restricted to VLT, often accompanied by  
218 ORF63 RNA (21). The DRG and TG represent the only sites of confirmed VZV  
219 reactivation from latency *in vivo* (27, 28). Little is known, however, about mechanisms of  
220 VZV latency and reactivation in sensory neurons, in part because most human stem-cell  
221 derived neuronal culture systems are typically comprised of few, if any, neurons  
222 expressing markers of sensory neurons (16). Here, we find that while both sensory and  
223 mixed neurons support an episomal configuration of VZV genomic DNA following axonal  
224 infection in a microfluidic platform, only sensory neurons recapitulate the *in vivo*  
225 expression of VLT. While it has been shown that expression of VLT can suppress  
226 expression of the viral transactivator ORF61 (21), the precise role of VLT RNA and/or  
227 protein in establishment or maintenance of latency remain to be elucidated. Nevertheless,

228 our data indicate that sensory neurons derived from human iPSC closely mirror the  
229 biology of VZV in human TGs with respect to expression of VLT.

230

231 In order for latency to be established *in vivo*, sensory and autonomic neuronal ganglia,  
232 including TG or DRG, must be infected and lytic infection must presumably be suppressed  
233 in order to prevent destruction of the neurons that will subsequently harbor latent infection.  
234 Whether lytic infection necessarily precedes establishment of latency is unknown. Routes  
235 by which VZV infects sensory ganglion neurons *in vivo* remain unclear, though several  
236 non-mutually exclusive routes have been proposed. One potential mechanism is  
237 dissemination of the virus to ganglia via VZV-infected lymphocytes. Indeed, VZV can  
238 infect T cells, and intravenous injection of VZV-infected T cells in a human fetal DRG  
239 xenograft SCID-hu mice model resulted in transfer of the virus to the transplanted neurons  
240 (9, 10, 29-31). In addition, T cells infected by the closest relative to VZV, simian varicella  
241 virus, have been found in the ganglia of primates during primary infection (32). More  
242 recently, other immune cells (monocytes, NK cells, NKT cells, and B cells, in addition to  
243 both CD4<sup>+</sup> and CD8<sup>+</sup> T cells) have been shown to support productive infection of VZV (33,  
244 34) and could potentially migrate and transfer the virus to sensory neurons. Such routes  
245 of infection would presumably enable direct access of the virus to the neuronal cell body.  
246 Our previous reports using HMN were less supportive for this hematogenous route for  
247 VZV latency as HMN are highly susceptible to VZV lytic infection by cell body infection  
248 (17) while axonal infection facilitated establishment of latency (16). A non-mutually  
249 exclusive proposal by which VZV accesses sensory ganglia is that retrograde axonal  
250 transport of the virus occurs from nerve endings innervating the dermis adjacent to

251 cutaneous varicella lesions. This has been supported by the detection of viral antigens in  
252 Schwann cells and peripheral nerve axons in patients with varicella, as well as  
253 observations that herpes zoster occurs at the site of vaccine inoculation or at sites most  
254 affected by primary varicella infection (35, 36). Recent *in vitro* studies have provided direct  
255 visual evidence of retrograde axonal transport of VZV (13), and cell-free virus infection by  
256 this route also enabled establishment of an *in vitro* latent state using human ESC-derived  
257 mixture neurons (15, 16). Intriguingly, we observed that axonal infection of sensory  
258 neurons resulted in an *in vitro* latent state more similar to latency in human TG than  
259 human ESC-derived mixed neurons, while neuronal cell body infection of HSN was met  
260 with marked resistance to lytic infection. Thus, our observations suggest that sensory  
261 neuronal latency could occur in a setting in which both hematogenous direct transfer and  
262 retrograde axonal transport occur, and further investigation of the interaction between  
263 immune cells and sensory neurons is warranted.

264

265 The cell bodies of sensory neurons are primarily located in the ganglion. While much has  
266 been learned in the past few decades regarding the electrophysiological and molecular  
267 characteristics of these sensory neurons, it has only recently been appreciated that other  
268 cells and structures within the DRG may contribute substantially to neuronal function (37).  
269 Satellite cells, for example, are a specific type of glia that form a close functional  
270 relationship with neurons within the DRG and can modify the neuronal microenvironment.  
271 Indeed, recent studies have demonstrated a critical role for these cells in the development  
272 of pain (38). Other immune cells, including macrophages, T lymphocytes, B lymphocytes,  
273 and mast cells are also present within the DRG and may also modulate neuronal function

274 (39, 40). While these other cell types may contribute to VZV neuropathogenesis *in vivo*,  
275 the absence of such cells in our *in vitro* model of VZV infection indicates that sensory  
276 neurons possess intrinsic, cell-autonomous properties that facilitate viral latency.

277

278 We and others have previously reported lytic infection of ESC- and iPSC-derived human  
279 sensory neurons, without noting resistance to infection (18, 19). In these reports, co-  
280 expression of the nuclear marker Brn3a and cytoplasmic marker peripherin served to  
281 mark sensory neurons; however, the maturation state of the cells was unclear as neurons  
282 were only differentiated for up to three weeks and additional markers of mature sensory  
283 neurons were not assessed. We found that Brn3a and peripherin were expressed early  
284 on during differentiation (within two weeks), while additional markers of mature sensory  
285 neurons, such Na<sub>v</sub>1.7 and Na<sub>v</sub>1.8, were increasingly expressed following the four week  
286 time point of differentiation, consistent with other reports (41). Thus, it is possible that the  
287 maturation state of human sensory neurons governs the relative resistance to lytic  
288 infection by VZV. Taken together we find that mature human sensory neurons possess  
289 intrinsic properties that restrict lytic infection and facilitate the development of VZV latency.

290

## 291 **MATERIALS and METHODS**

### 292 **Cells**

293 Human iPSC-derived sensory neuron progenitors (HSN; ax0055, Axol Bioscience) were  
294 plated on a 24-well plate ( $1 \times 10^5$  cells/well) or a microfluidic platform ( $7.5 \times 10^4$   
295 cells/sector) in Neuronal Plating-XF Medium (Axol Bioscience). Fabrication of a  
296 microfluidic platform was previously described (16, 18). Prior to plating the HSN

297 progenitors, a plate or microfluidic platform was coated with poly-L-ornithine (Sigma-  
298 Aldrich) (20 µg/mL) or poly-D-lysine (Sigma-Aldrich) (200 µg/mL) in molecular grade  
299 water at room temperature overnight, washed with distilled water twice and coated with  
300 Matrigel (Corning) (1 µg/mL) in Knockout DMEM/F-12 medium (Thermo Fisher Scientific)  
301 for two hours at room temperature following overnight incubation at 37°C in a humidified  
302 5% CO<sub>2</sub> incubator. At one day after plating, the medium was replaced to the complete  
303 maintenance medium consisting of Neurobasal Plus Medium, B-27 Plus Supplement (2%  
304 [vol/vol]), N2 Supplement (1% [vol/vol]), GlutaMAX-I (2 mM) (Thermo Fisher Scientific),  
305 ascorbic acid (200 µM; Sigma-Aldrich), GDNF (25 ng/mL), NGF (25 ng/mL), BDNF (10  
306 ng/mL) and NT-3 (10 ng/mL) (Peprotech) for sensory neuronal maturation. Two days after  
307 the plating the HSN progenitors, cells were treated with the complete maintenance  
308 medium with mitomycin C (2.5 µg/mL; Nacalai Tesque, Inc) for two hours to eliminate  
309 proliferating cells, washed with the complete medium twice and cultured in the complete  
310 maintenance medium with replacement of half the volume of culture with fresh media  
311 every four days. During maturation in the microfluidic platform, culture medium level in  
312 the axonal compartment was kept higher than that in the somal compartment to prevent  
313 cell migration to the axonal compartment. H9 human ESC-derived neural stem cells  
314 (NSCs) (Passage four to ten) were cultured in proliferating media consisting of Knockout  
315 DMEM/F-12 media supplemented with GlutaMAX-I (2 mM), bFGF (20 ng/mL), EGF (20  
316 ng/mL) and StemPro Neural Supplement (2% [vol/vol]) (Thermo Fisher Scientific). NSCs  
317 were differentiated into HMNs utilizing a neuronal differentiation medium prepared in  
318 Neurobasal Medium with B-27 Serum-Free supplement (2% [vol/vol]) (Thermo Fisher  
319 Scientific), and GlutaMAX-I (2 mM). Cells were seeded at a density of 0.5 - 1 × 10<sup>5</sup>

320 cells/cm<sup>2</sup>, plated in proliferation media for two days and were then differentiated for four  
321 to six weeks before experiments were performed. Human retinal pigmented epithelium  
322 ARPE-19 cells (American Type Culture Collection [ATCC] CRL-2302) were maintained in  
323 DMEM/F-12+GlutaMAX-I (Thermo Fisher Scientific) supplemented with heat-inactivated  
324 8% FBS (fetal bovine serum; Sigma-Aldrich).

325

### 326 **Immunostaining and imaging**

327 HSNs and HMNs were washed once with phosphate-buffered saline (PBS) and fixed with  
328 4% paraformaldehyde for 20 minutes (min) at room temperature. Cells were washed with  
329 PBS before treatment with 0.25% Triton X-100 and 5% normal donkey serum for one  
330 hour. Primary antibodies, mouse anti-Na<sub>v</sub>1.7 monoclonal antibody (clone N68/6, Abcam)  
331 (1:100), mouse anti-Na<sub>v</sub>1.8 monoclonal antibody (clone N134/12, Abcam) (1:100), goat  
332 anti-Peripherin polyclonal antibody (C-19, Santa Cruz) (1:200), mouse anti-Brn3a  
333 monoclonal antibody (clone 5A3.2, Chemicon) (1:100), chicken anti-Neurofilament  
334 polyclonal antibody (NFM, Aves Lab) (1:200), mouse anti-Islet 1 monoclonal antibody  
335 (clone 1B1, Abcam) (1:200), rabbit anti-Tuj1 polyclonal antibody (Poly18020, Covance)  
336 (1:200), and mouse anti-Tuj1 monoclonal antibody (clone TuJ-1, R&D systems) (1:500)  
337 were used to stain overnight at 4°C. After three washes with 1X PBS, appropriate Alexa  
338 Fluor 488/555/647-conjugated anti-rat/rabbit/mouse/goat/chicken secondary (1:250,  
339 Thermo Fisher Scientific) in donkey serum were incubated for 1.5 hours (hrs) at room  
340 temperature. Finally samples were counter stained for nucleus with 1 μM DAPI (4', 6-  
341 diamidino-2'-phenylindoldihydrochloride; Thermo Fisher Scientific). Zeiss inverted Axio  
342 Observer fluorescent microscope (Zeiss, Germany) was used to image the cells.



343

## 344 **Viral infections**

345 Cell-free virus of VZV strain pOka (parental Oka) or rVZV<sub>LUC</sub>BAC (derived from pOka)  
346 reconstituted in MRC-5 cells by transfection of VZV<sub>LUC</sub>BAC DNA (from Hua Zhu, New  
347 Jersey Medical School, Rutgers University, Newark, NJ) were prepared and titrated as  
348 described previously (18, 42).

349

350 For lytic infection, neurons were infected with cell-free virus for two hours in 300  $\mu$ L  
351 medium, washed with the medium twice, treated with low pH buffer (40 mM sodium citrate,  
352 10 mM potassium chloride, 135 mM sodium chloride [pH 3.2]) for 30 seconds (sec),  
353 washed with the media once and cultured for indicated durations. For VZV *in vitro* latency,  
354 we applied slight modifications to our previous methodology (16, 18). Briefly, neurons  
355 were differentiated in a microfluidic platform for 54 days and infected from axonal  
356 compartment with 10  $\mu$ L of the cell-free virus (400 pfu titrated on ARPE-19 cells) with 10  
357  $\mu$ L media. After two hours infection, inoculum was removed, and axonal compartments  
358 were treated with the low pH buffer for 30 sec, washed with the media and cultured for  
359 two weeks.

360

361 To visualize infectious foci on ARPE-19 cells, cells were fixed with 4%  
362 paraformaldehyde/PBS (Nacalai Tesque, Inc.), stained with mouse anti-gE monoclonal  
363 Ab (clone 9) (1:10 dilution in PBS) (43), followed by anti-mouse IgG horseradish  
364 peroxidase (HRP)-linked whole Ab sheep (1:5,000 dilution in PBS) (GE Healthcare Bio-

365 Sciences), and reacted with 3, 3', 5, 5'-tetramethylbenzidine-H peroxidase substrate  
366 (Moss, Inc.).

367

### 368 **Western Blot**

369 Proteins were harvested four to five days post virus infection in RIPA Lysis and Extraction  
370 Buffer (Boston Bio) with 1X Protease Inhibitor and 1X Phosphatase Inhibitor (Thermo  
371 Fisher Scientific). Protein Concentration was determined using BCA Assay Kit (Thermo  
372 Fisher Scientific) as per manufacturer's protocol. 20 µg of protein were separated by  
373 loading in 4-15% MINI-PROTEAN TGX gel (Bio-Rad) followed by transfer onto 0.2 µm  
374 nitrocellulose membrane, Trans-Blot Turbo pack (Bio-Rad). Membrane was further  
375 blocked with 5% milk in 1X PBS and Tween 20 for 30 min followed by incubation with  
376 mouse anti-gE monoclonal antibody (clone 8612, EMD Millipore) (1:3,000) and  
377 appropriate control rabbit anti-GAPDH monoclonal antibody (clone D16H11, Cell  
378 Signaling Technology) (1:5,000) overnight at 4°C. The following day, the membrane was  
379 probed with HRP-conjugated anti-mouse or anti-rabbit (1:5,000, GE Healthcare Bio-  
380 Sciences) secondary antibody after washing several times with 1X PBS for 45 min at  
381 room temperature. The antibody binding was detected using SuperSignal West Femto  
382 (Thermo Fisher Scientific) incubated for five minutes in dark and visualized using  
383 Universal Hood II Gel Doc System (Bio-Rad).

384

### 385 **Flow cytometry**

386 Cells were washed once after removing culture media with 1X PBS and then incubated  
387 in Accutase (Sigma-Aldrich) for 10 min to harvest the cells. The cells were then

388 neutralized and centrifuged at 200 x g for four minutes to collect pellets. The samples  
389 were then re-suspended in 500 µL of cold 1X PBS and transferred into 5 mL polystyrene  
390 round bottom flow tube with cell strainer cap (Corning). Samples were then analyzed for  
391 GFP positive cells for each time point and condition until the cell count events reached at  
392 least 10,000.

393

#### 394 **Nucleotide extraction and Quantitative PCR.**

395 DNA and RNA from VZV-infected human sensory neurons were isolated using the  
396 FavorPrep Blood/Cultured Cell Total RNA Mini Kit (Favorgen Biotech) in combination with  
397 the NucleoSpin RNA/DNA buffer set (Macherey-Nagel). DNA was first eluted from the  
398 column in 100 µL DNA elution buffer, the column was treated with recombinant DNase I  
399 (20 units/100 µL; Roche Diagnostics) for 30 min at 37°C and RNA was eluted in 50 µL  
400 nuclease free water. RNA was directly treated with Baseline-ZERO DNase (2.5 units/50  
401 µL; Epicentre) for 30 min at 37°C. cDNA was synthesized with 12 µL of RNA and  
402 anchored oligo(dT)<sub>18</sub> primer in a 20 µL reaction using the Transcriptor First Strand cDNA  
403 synthesis kit at 55°C for 30 min for reverse transcriptase reaction (Roche Diagnostics).

404

405 DNA or cDNAs were subjected to quantitative PCR (qPCR) using KOD SYBR qPCR Mix  
406 (TOYOBO) in the StepOnePlus Real-time PCR system (Thermo Fisher Scientific) (1 µL  
407 of DNA or cDNA per 10 µL reaction in duplicate). All primer sets used for qPCR (**Table**  
408 **1**) were first confirmed for the amplification rate (98-100%) using 10-10<sup>6</sup> copies (10-fold  
409 dilution) of pOka-BAC genome or VLT plasmid (21) and the lack of non-specific  
410 amplification using water. The qPCR program is as follows; 95°C for 2 min (1 cycle), 95°C

411 for 10 sec and 60°C 15 sec (40 cycles), and 60 to 95°C for a dissociation curve analysis.  
412 Data is presented as relative VZV level to cellular beta-actin (cDNA) or CD24 (DNA)  
413 defined as  $2^{-(Ct\text{-value VZV gene} - Ct\text{-value beta-actin or CD24})}$ .

414

## 415 **ACKNOWLEDGEMENTS**

416 This work was supported by the National Institutes of Health (R21 NS107991 to A.V.) and  
417 the Takeda Science Foundation, Daiichi Sankyo Foundation of Life Science, Japan  
418 Society for the Promotion of Science (JSPS KAKENHI JP17K008858, JP16H06429 and  
419 JP16K21723) and the Ministry of Education, Culture, Sports, Science and Technology  
420 (MEXT KAKENHI JP17H05816) (T. S.).

421

## 422 **FIGURE LEGENDS**

423 **Figure 1. Characterization of a human sensory neuron system to study VZV**  
424 **infection.** Human sensory progenitor cells are differentiated over the course of six to  
425 seven weeks. At two weeks (A), many cells express the pan-neuronal markers  
426 neurofilament (NF) and beta III tubulin (Tuj1). Some cells express peripherin, a marker  
427 found mainly on neurons of the peripheral nervous system, and expression is colocalized  
428 with Tuj1. Brn3a and Islet 1, markers of sensory neurons, begin to be expressed in  
429 subsets of cells. By four to five weeks (B), many neurons (expressing Tuj1) coexpress  
430 Brn3a, and expression of the sensory neuron voltage-gated sodium ion channels Na<sub>v</sub>1.7  
431 and Na<sub>v</sub>1.8 are found in subsets of Tuj1<sup>+</sup>/peripherin<sup>+</sup> sensory neurons. By six to seven  
432 weeks (C, upper row), virtually all cells are Tuj1<sup>+</sup>/peripherin<sup>+</sup> sensory neurons. By this  
433 time, Brn3a and Islet 1 are appropriately localized to the nucleus, and Na<sub>v</sub>1.8 expression

434 is seen in many cells. In contrast, HMNs (C, lower row), while robustly expressing the  
435 pan-neuronal marker Tuj1, are not observed to express Brn3a, Islet 1, or Nav1.8. Scale  
436 bars; 50  $\mu$ m.

437

438 **Figure 2. Human sensory neurons are resistant to lytic infection by VZV under**  
439 **standard conditions.** (A) Neurons differentiated for six to seven weeks are either mock-  
440 infected (Mock) or infected by 100 PFU of rVZV<sub>LUCBAC</sub> (VZV) and observed for GFP  
441 expression over five days. Clusters of GFP+ cells are seen in HMNs but not HSNs (B)  
442 Flow cytometry confirms that while HMNs robustly support GFP expression, HSNs do not  
443 (three separate infections for each condition are shown). GFP channel is plotted on X-  
444 axis, while PE channel (negative control) is plotted on the Y-axis. Numbers refer to  
445 percentage of GFP+ cells. (C) Western blot analysis of expression of VZV glycoprotein E  
446 (gE) in HMNs and HSNs infected by VZV.

447

448 **Figure 3. Sensory neurons are relatively resistant to lytic infection.** (A) Neurons  
449 differentiated for six to seven weeks are infected by rVZV<sub>LUCBAC</sub> and undergo flow  
450 cytometry for detection of GFP expression at 5 d.p.i. HMNs are infected with 200 PFU,  
451 while HSNs are infected with 400, 800, and 2,000 PFU of virus. GFP channel is plotted  
452 on X-axis, while PE channel (negative control) is plotted on the Y-axis. Numbers refer to  
453 percentage of GFP+ cells. (B) Transcriptional analysis of infected HMNs and three  
454 separate cultures of HSNs (labeled 1-3). (C) qPCR demonstrates that VZV DNA can be  
455 detected in each of the HSN cultures, though at substantially lower levels than in HMNs.

456

457 **Figure 4. Sensory neurons are capable of supporting productive viral infection.** (A,  
458 B) HSNs differentiated for six weeks are infected with 400 PFU of pOka VZV for one to  
459 two weeks prior to analysis. (A) Transcriptional analysis demonstrates that ORF61,  
460 ORF29, and ORF14 are detected at increasing levels from one to two w.p.i. (B) VZV DNA  
461 is detected at increasing amounts from one to two w.p.i. (C) Infectious focus forming  
462 assay performed from HSNs infected for one or two weeks prior to application atop a  
463 monolayer of ARPE19 cells.

464

465 **Figure 5. *In vitro* latency in sensory neurons resembles the *in vivo* state.** (A)  
466 Schematic of *in vitro* latency design. S; somal compartment, A; axonal compartment, M;  
467 microchannels. VZV virion and infected neurons are shown in orange. (B) Transcriptional  
468 analysis in axonally-infected HMNs and HSNs (3 separate cultures each, labeled 1-3).  
469 (C) qPCR to determine the configuration of the viral genome using the ratio of terminal  
470 repeat joint and genomic linear region (ORF10) abundance (n=3). (D) Latently infected  
471 HSNs were treated with anti-NGF Ab (50 mg/mL) for 14 days to determine whether VZV  
472 reactivation would occur. Infectious focus forming assay on ARPE19 cells demonstrates  
473 successful reactivation in one of two wells depicted.

474

475

476 **REFERENCES**

477

- 478 1. Chesnut G, McClain D, Galeckas K. 2012. Varicella-zoster virus in children  
479 immunized with the varicella vaccine. *Cutis* 90:114-6.
- 480 2. Uebe B, Sauerbrei A, Burdach S, Horneff G. 2002. Herpes zoster by reactivated  
481 vaccine varicella zoster virus in a healthy child. *Eur J Pediatr* 161:442-4.
- 482 3. Gilden D, Nagel MA, Mahalingam R, Mueller NH, Brazeau EA, Pugazhenti S,  
483 Cohrs RJ. 2009. Clinical and molecular aspects of varicella zoster virus infection.  
484 *Future Neurol* 4:103-117.
- 485 4. Gilden DH, Kleinschmidt-DeMasters BK, LaGuardia JJ, Mahalingam R, Cohrs  
486 RJ. 2000. Neurologic complications of the reactivation of varicella-zoster virus. *N*  
487 *Engl J Med* 342:635-45.
- 488 5. Lavi E, Gilden D, Nagel M, White T, Grose C. 2015. Prevalence and distribution  
489 of VZV in temporal arteries of patients with giant cell arteritis. *Neurology* 85:1914-  
490 5.
- 491 6. Saylor D, Thakur K, Venkatesan A. 2015. Acute encephalitis in the  
492 immunocompromised individual. *Curr Opin Infect Dis* 28:330-6.
- 493 7. Hood C, Cunningham AL, Slobedman B, Boadle RA, Abendroth A. 2003.  
494 Varicella-zoster virus-infected human sensory neurons are resistant to apoptosis,  
495 yet human foreskin fibroblasts are susceptible: evidence for a cell-type-specific  
496 apoptotic response. *J Virol* 77:12852-64.

- 497 8. Gowrishankar K, Slobedman B, Cunningham AL, Miranda-Saksena M, Boadle  
498 RA, Abendroth A. 2007. Productive varicella-zoster virus infection of cultured  
499 intact human ganglia. *J Virol* 81:6752-6.
- 500 9. Moffat JF, Stein MD, Kaneshima H, Arvin AM. 1995. Tropism of varicella-zoster  
501 virus for human CD4+ and CD8+ T lymphocytes and epidermal cells in SCID-hu  
502 mice. *J Virol* 69:5236-42.
- 503 10. Zerboni L, Ku CC, Jones CD, Zehnder JL, Arvin AM. 2005. Varicella-zoster virus  
504 infection of human dorsal root ganglia in vivo. *Proc Natl Acad Sci U S A*  
505 102:6490-5.
- 506 11. Zerboni L, Arvin A. 2015. Neuronal Subtype and Satellite Cell Tropism Are  
507 Determinants of Varicella-Zoster Virus Virulence in Human Dorsal Root Ganglia  
508 Xenografts In Vivo. *PLoS Pathog* 11:e1004989.
- 509 12. Pugazhenti S, Nair S, Velmurugan K, Liang Q, Mahalingam R, Cohrs RJ, Nagel  
510 MA, Gildea D. 2011. Varicella-zoster virus infection of differentiated human  
511 neural stem cells. *J Virol* 85:6678-86.
- 512 13. Markus A, Grigoryan S, Sloutskin A, Yee MB, Zhu H, Yang IH, Thakor NV, Sarid  
513 R, Kinchington PR, Goldstein RS. 2011. Varicella-zoster virus (VZV) infection of  
514 neurons derived from human embryonic stem cells: direct demonstration of  
515 axonal infection, transport of VZV, and productive neuronal infection. *J Virol*  
516 85:6220-33.
- 517 14. Markus A, Waldman Ben-Asher H, Kinchington PR, Goldstein RS. 2014. Cellular  
518 transcriptome analysis reveals differential expression of pro- and antiapoptosis



- 519 genes by varicella-zoster virus-infected neurons and fibroblasts. *J Virol* 88:7674-  
520 7.
- 521 15. Markus A, Lebenthal-Loinger I, Yang IH, Kinchington PR, Goldstein RS. 2015.  
522 An in vitro model of latency and reactivation of varicella zoster virus in human  
523 stem cell-derived neurons. *PLoS Pathog* 11:e1004885.
- 524 16. Sadaoka T, Depledge DP, Rajbhandari L, Venkatesan A, Breuer J, Cohen JI.  
525 2016. In vitro system using human neurons demonstrates that varicella-zoster  
526 vaccine virus is impaired for reactivation, but not latency. *Proc Natl Acad Sci U S*  
527 *A* 113:E2403-12.
- 528 17. Sadaoka T, Schwartz CL, Rajbhandari L, Venkatesan A, Cohen JI. 2018. Human  
529 Embryonic Stem Cell-Derived Neurons Are Highly Permissive for Varicella-Zoster  
530 Virus Lytic Infection. *J Virol* 92.
- 531 18. Kurapati S, Sadaoka T, Rajbhandari L, Jagdish B, Shukla P, Ali MA, Kim YJ, Lee  
532 G, Cohen JI, Venkatesan A. 2017. Role of the JNK Pathway in Varicella-Zoster  
533 Virus Lytic Infection and Reactivation. *J Virol* 91.
- 534 19. Lee KS, Zhou W, Scott-McKean JJ, Emmerling KL, Cai GY, Krah DL, Costa AC,  
535 Freed CR, Levin MJ. 2012. Human sensory neurons derived from induced  
536 pluripotent stem cells support varicella-zoster virus infection. *PLoS One*  
537 7:e53010.
- 538 20. Zhang Z, Rowe J, Wang W, Sommer M, Arvin A, Moffat J, Zhu H. 2007. Genetic  
539 analysis of varicella-zoster virus ORF0 to ORF4 by use of a novel luciferase  
540 bacterial artificial chromosome system. *J Virol* 81:9024-33.

- 541 21. Depledge DP, Ouwendijk WJD, Sadaoka T, Braspenning SE, Mori Y, Cohrs RJ,  
542 Verjans GMGM, Breuer J. 2018. A spliced latency-associated VZV transcript  
543 maps antisense to the viral transactivator gene 61. *Nat Commun* 9:1167.
- 544 22. Clarke P, Beer T, Cohrs R, Gilden DH. 1995. Configuration of latent varicella-  
545 zoster virus DNA. *J Virol* 69:8151-4.
- 546 23. Cheung AK. 1991. Cloning of the latency gene and the early protein 0 gene of  
547 pseudorabies virus. *J Virol* 65:5260-71.
- 548 24. Rock DL, Beam SL, Mayfield JE. 1987. Mapping bovine herpesvirus type 1  
549 latency-related RNA in trigeminal ganglia of latently infected rabbits. *J Virol*  
550 61:3827-31.
- 551 25. Stevens JG, Wagner EK, Devi-Rao GB, Cook ML, Feldman LT. 1987. RNA  
552 complementary to a herpesvirus alpha gene mRNA is prominent in latently  
553 infected neurons. *Science* 235:1056-9.
- 554 26. Depledge DP, Sadaoka T, Ouwendijk WJD. 2018. Molecular Aspects of  
555 Varicella-Zoster Virus Latency. *Viruses* 10.
- 556 27. Kennedy PG, Grinfeld E, Gow JW. 1998. Latent varicella-zoster virus is located  
557 predominantly in neurons in human trigeminal ganglia. *Proc Natl Acad Sci U S A*  
558 95:4658-62.
- 559 28. Kennedy PG, Grinfeld E, Gow JW. 1999. Latent Varicella-zoster virus in human  
560 dorsal root ganglia. *Virology* 258:451-4.
- 561 29. Gershon AA, Chen J, Davis L, Krinsky C, Cowles R, Reichard R, Gershon M.  
562 2012. Latency of varicella zoster virus in dorsal root, cranial, and enteric ganglia  
563 in vaccinated children. *Trans Am Clin Climatol Assoc* 123:17-33; discussion 33-5.

- 564 30. Gershon AA, Breuer J, Cohen JI, Cohrs RJ, Gershon MD, Gilden D, Grose C,  
565 Hambleton S, Kennedy PG, Oxman MN, Seward JF, Yamanishi K. 2015.  
566 Varicella zoster virus infection. *Nat Rev Dis Primers* 1:15016.
- 567 31. Zerboni L, Arvin A. 2011. Investigation of varicella-zoster virus neurotropism and  
568 neurovirulence using SCID mouse-human DRG xenografts. *J Neurovirol* 17:570-  
569 7.
- 570 32. Ouwendijk WJ, Mahalingam R, de Swart RL, Haagmans BL, van Amerongen G,  
571 Getu S, Gilden D, Osterhaus AD, Verjans GM. 2013. T-Cell tropism of simian  
572 varicella virus during primary infection. *PLoS Pathog* 9:e1003368.
- 573 33. Campbell TM, McSharry BP, Steain M, Russell TA, Tscharke DC, Kennedy JJ,  
574 Slobedman B, Abendroth A. 2019. Functional paralysis of human natural killer  
575 cells by alphaherpesviruses. *PLoS Pathog* 15:e1007784.
- 576 34. Jones D, Como CN, Jing L, Blackmon A, Neff CP, Krueger O, Bubak AN, Palmer  
577 BE, Koelle DM, Nagel MA. 2019. Varicella zoster virus productively infects  
578 human peripheral blood mononuclear cells to modulate expression of  
579 immunoinhibitory proteins and blocking PD-L1 enhances virus-specific CD8+ T  
580 cell effector function. *PLoS Pathog* 15:e1007650.
- 581 35. Annunziato PW, Lungu O, Panagiotidis C, Zhang JH, Silvers DN, Gershon AA,  
582 Silverstein SJ. 2000. Varicella-zoster virus proteins in skin lesions: implications  
583 for a novel role of ORF29p in chickenpox. *J Virol* 74:2005-10.
- 584 36. Hardy I, Gershon AA, Steinberg SP, LaRussa P. 1991. The incidence of zoster  
585 after immunization with live attenuated varicella vaccine. A study in children with

- 586 leukemia. Varicella Vaccine Collaborative Study Group. *N Engl J Med* 325:1545-  
587 50.
- 588 37. Haberberger RV, Barry C, Dominguez N, Matusica D. 2019. Human Dorsal Root  
589 Ganglia. *Front Cell Neurosci* 13:271.
- 590 38. Lemes JBP, de Campos Lima T, Santos DO, Neves AF, de Oliveira FS, Parada  
591 CA, da Cruz Lotufo CM. 2018. Participation of satellite glial cells of the dorsal  
592 root ganglia in acute nociception. *Neurosci Lett* 676:8-12.
- 593 39. Makker PG, Duffy SS, Lees JG, Perera CJ, Tonkin RS, Butovsky O, Park SB,  
594 Goldstein D, Moalem-Taylor G. 2017. Characterisation of Immune and  
595 Neuroinflammatory Changes Associated with Chemotherapy-Induced Peripheral  
596 Neuropathy. *PLoS One* 12:e0170814.
- 597 40. Lakritz JR, Bodair A, Shah N, O'Donnell R, Polydefkis MJ, Miller AD, Burdo TH.  
598 2015. Monocyte Traffic, Dorsal Root Ganglion Histopathology, and Loss of  
599 Intraepidermal Nerve Fiber Density in SIV Peripheral Neuropathy. *Am J Pathol*  
600 185:1912-23.
- 601 41. Guimarães MZP, De Vecchi R, Vitória G, Sochacki JK, Paulsen BS, Lima I,  
602 Rodrigues da Silva F, da Costa RFM, Castro NG, Breton L, Rehen SK. 2018.  
603 Generation of iPSC-Derived Human Peripheral Sensory Neurons Releasing  
604 Substance P Elicited by TRPV1 Agonists. *Front Mol Neurosci* 11:277.
- 605 42. Sadaoka T, Serada S, Kato J, Hayashi M, Gomi Y, Naka T, Yamanishi K, Mori Y.  
606 2014. Varicella-zoster virus ORF49 functions in the efficient production of  
607 progeny virus through its interaction with essential tegument protein ORF44. *J*  
608 *Virology* 88:188-201.

609 43. Okuno T, Yamanishi K, Shiraki K, Takahashi M. 1983. Synthesis and processing  
610 of glycoproteins of Varicella-Zoster virus (VZV) as studied with monoclonal  
611 antibodies to VZV antigens. *Virology* 129:357-68.

612

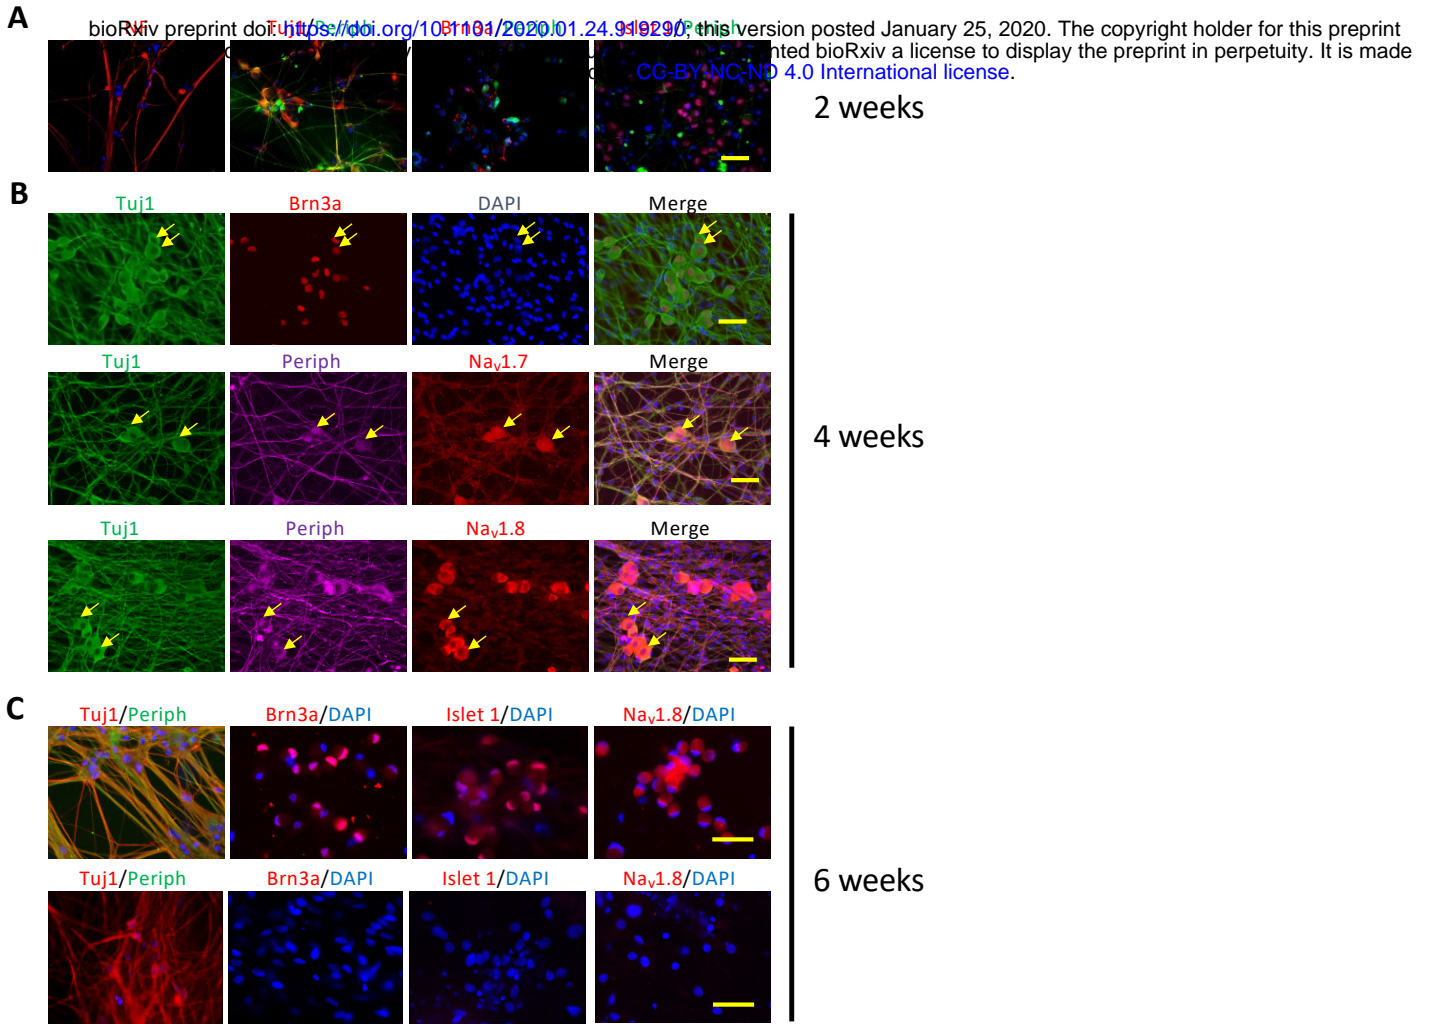

**Figure 1. Characterization of a human sensory neuron system to study VZV infection.** Human sensory progenitor cells are differentiated over the course of six to seven weeks. At two weeks (A), many cells express the pan-neuronal markers neurofilament (NF) and beta III tubulin (Tuj1). Some cells express peripherin, a marker found mainly on neurons of the peripheral nervous system, and expression is colocalized with Tuj1. Brn3a and Islet 1, markers of sensory neurons, begin to be expressed in subsets of cells. By four to five weeks (B), many neurons (expressing Tuj1) coexpress Brn3a, and expression of the sensory neuron voltage-gated sodium ion channels  $Na_v1.7$  and  $Na_v1.8$  are found in subsets of Tuj1+/peripherin+ sensory neurons. By six to seven weeks (C, upper row), virtually all cells are Tuj1+/peripherin+ sensory neurons. By this time, Brn3a and Islet 1 are appropriately localized to the nucleus, and  $Na_v1.8$  expression is seen in many cells. In contrast, HMNs (C, lower row), while robustly expressing the pan-neuronal marker Tuj1, are not observed to express Brn3a, Islet 1, or  $Na_v1.8$ . Scale bars; 50  $\mu$ m.

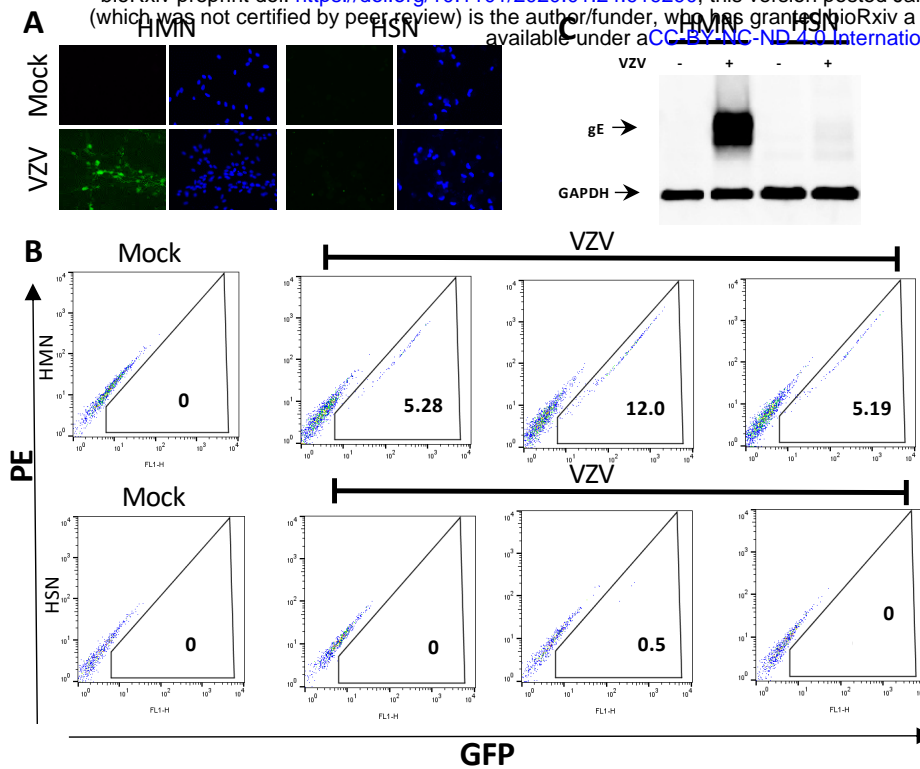

**Figure 2. Human sensory neurons are resistant to lytic infection by VZV under standard conditions.** (A) Neurons differentiated for six to seven weeks are either mock-infected (Mock) or infected by 100 PFU of rVZV<sub>LUC</sub>BAC (VZV) and observed for GFP expression over five days. Clusters of GFP+ cells are seen in HMNs but not HSNs (B) Flow cytometry confirms that while HMNs robustly support GFP expression, HSNs do not (three separate infections for each condition are shown). GFP channel is plotted on X-axis, while PE channel (negative control) is plotted on the Y-axis. Numbers refer to percentage of GFP+ cells. (C) Western blot analysis of expression of VZV glycoprotein E (gE) in HMNs and HSNs infected by VZV.

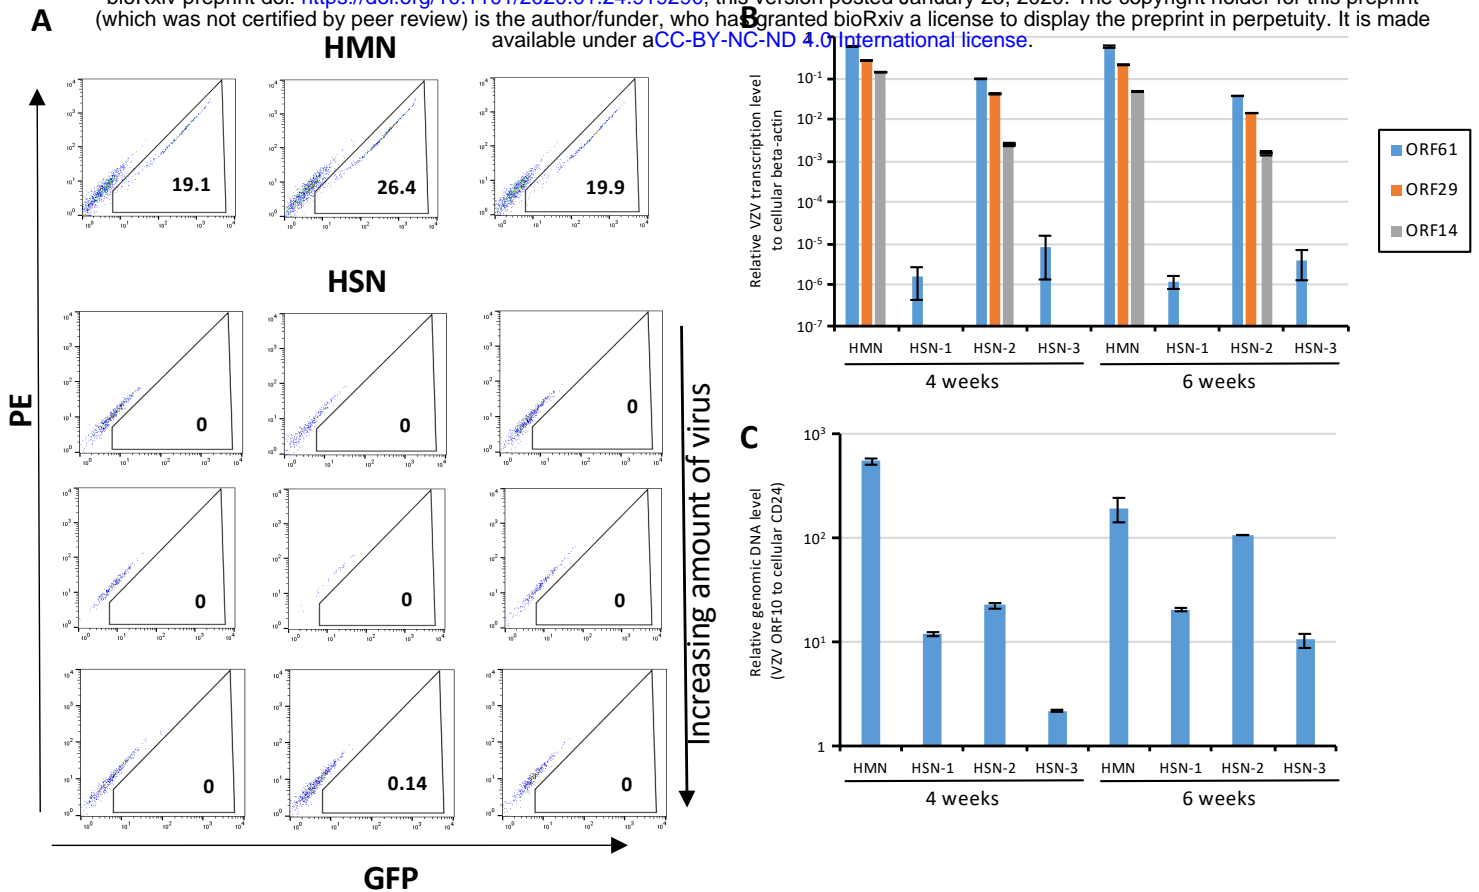

**Figure 3. Sensory neurons are relatively resistant to lytic infection.** (A) Neurons differentiated for six to seven weeks are infected by rVZV<sub>LUC</sub>BAC and undergo flow cytometry for detection of GFP expression at 5 d.p.i. HMNs are infected with 200 PFU, while HSNs are infected with 400, 800, and 2,000 PFU of virus. GFP channel is plotted on X-axis, while PE channel (negative control) is plotted on the Y-axis. Numbers refer to percentage of GFP+ cells. (B) Transcriptional analysis of infected HMNs and three separate cultures of HSNs (labeled 1-3). (C) qPCR demonstrates that VZV DNA can be detected in each of the HSN cultures, though at substantially lower HMN levels than in HMNs.



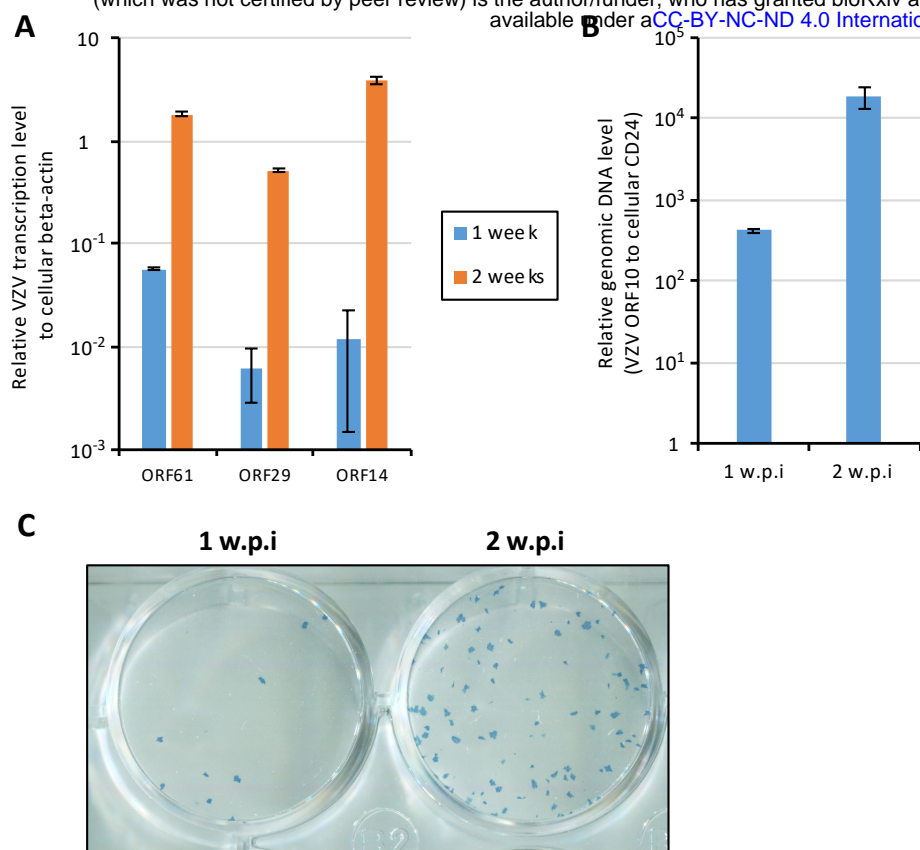

**Figure 4. Sensory neurons are capable of supporting productive viral infection.** (A, B) HSNs differentiated for six weeks are infected with 400 PFU of pOka VZV for one to two weeks prior to analysis. (A) Transcriptional analysis demonstrates that ORF61, ORF29, and ORF14 are detected at increasing levels from one to two w.p.i. (B) VZV DNA is detected at increasing amounts from one to two w.p.i. (C) Infectious focus forming assay performed from HSNs infected for one or two weeks prior to application atop a monolayer of ARPE19 cells.

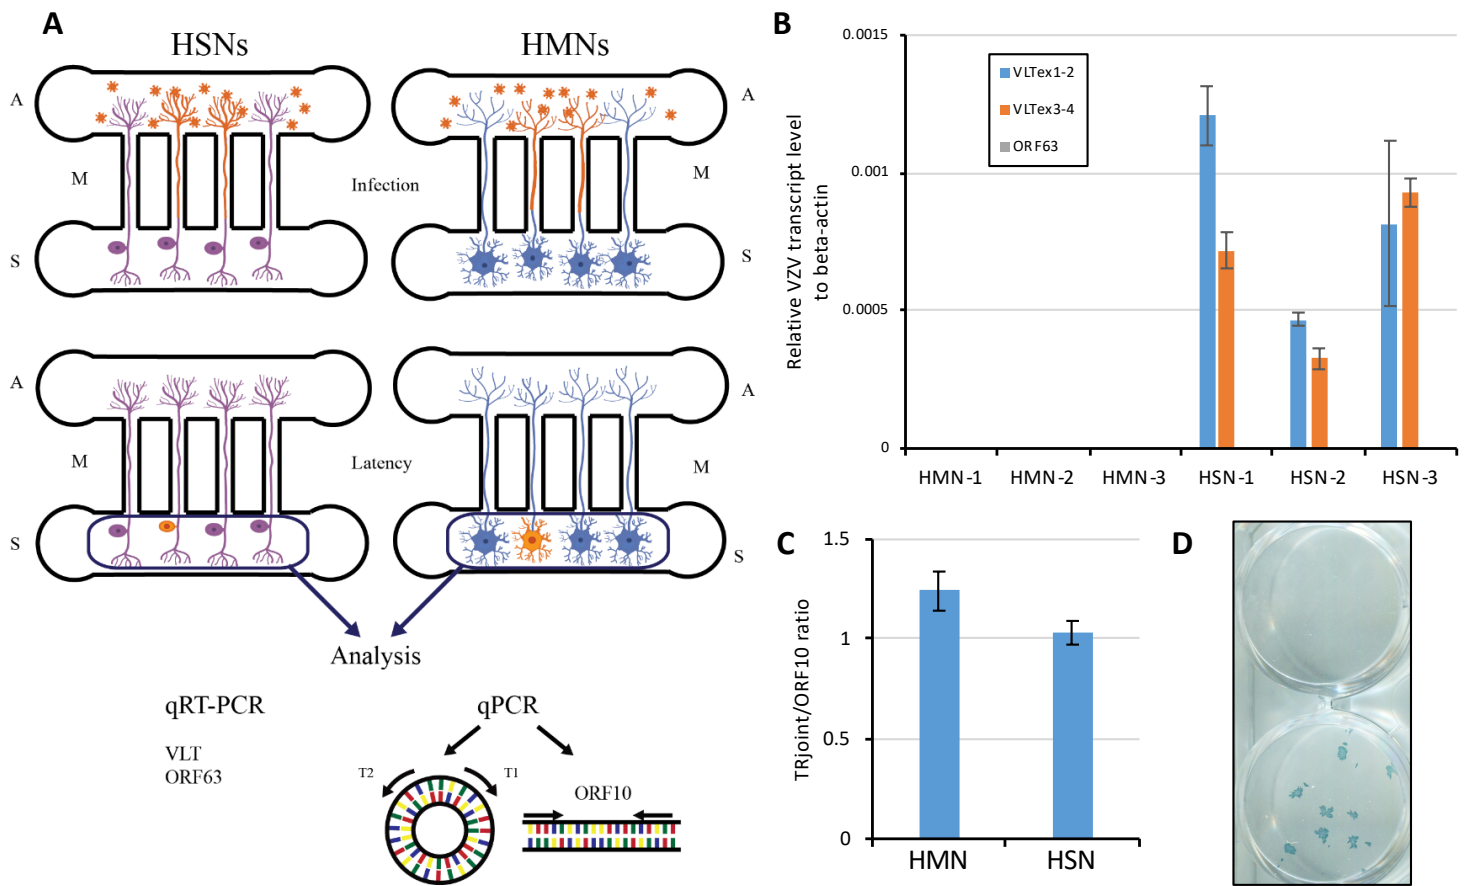

**Figure 5. *In vitro* latency in sensory neurons resembles the *in vivo* state.** (A) Schematic of *in vitro* latency design. S; somal compartment, A; axonal compartment, M; microchannels. VZV virion and infected neurons are shown in orange. (B) Transcriptional analysis in axonally-infected HMNs and HSNs (3 separate cultures each, labeled 1-3). (C) qPCR to determine the configuration of the viral genome using the ratio of terminal repeat joint and genomic linear region (ORF10) abundance (n=3). (D) Latently infected HSNs were treated with anti-NGF Ab (50 mg/mL) for 14 days to determine whether VZV reactivation would occur. Infectious focus forming assay on ARPE19 cells demonstrates successful reactivation in one of two wells depicted.

**Table 1. Primers for qPCR assay.**

bioRxiv preprint doi: <https://doi.org/10.1101/2020.01.24.919290>; this version posted January 25, 2020. The copyright holder for this preprint (which was not certified by peer review) is the author/funder, who has granted bioRxiv a license to display the preprint in perpetuity. It is made available under aCC-BY-NC-ND 4.0 International license.

| Target                | Name            | Sequence (5'-3')               |
|-----------------------|-----------------|--------------------------------|
| beta-actin            | beta-actinF961  | GCA CCC AGC ACA ATG AAG A      |
|                       | beta-actinR1024 | CGA TCC ACA CGG AGT ACT TG     |
| CD24                  | CD24F137        | TGG CCC CAA ATC CAA CTA        |
|                       | CD24R208        | CGA AGA GAC TGG CTG TTG ACT    |
| ORF10                 | ORF10F1088      | GAG CGG ATC ATC CTT ACG CA     |
|                       | ORF10R1229      | CGC GTT AAA AAC CCA CAC GT     |
| ORF14                 | ORF14F1474      | TCG GAA CTC GAC GGA CCT AT     |
|                       | ORF14R1661      | AGG GTT GCG ATA ACT GCG AT     |
| ORF29                 | ORF29F2381      | GCC TTG CAA GTG CGT ACC        |
|                       | ORF29R2440      | CTA GGG CCC CGT GTA ACA TA     |
| ORF61                 | ORF61F150       | CAG CGT CCA GTG TCC TCT CT     |
|                       | ORF61R210       | ACT TAC GAT CTT ATG CAG GAT GG |
| ORF63                 | ORF63F556       | TCG GAC GGG GAA GAC TTT AT     |
|                       | ORF63R622       | CGT CTG GTT CAC AAG AAT CG     |
| VLTex1-2              | VLTexon1F102413 | GGC ATT TTA AAC GGG TCC GG     |
|                       | VLTexon2R102864 | CCC TGG TAA GTC CGT ACA CG     |
| VLTex3-4              | VLTexon3F103794 | TGG ACG ATC ACG GTA GTC CT     |
|                       | VLTexon4R104361 | CGG AAA AAC CAT GCC GTG TT     |
| Terminal repeat joint | T1F125029       | AGT GTC TGT CTG TCT GTG CG     |
|                       | T2R139          | CGC GGG TTT TGT TAA AGG CT     |
